# Supplementary material for: Population Disequilibrium as Promoter of Adaptive Explorations in Hepatitis C Virus
Source: MDPI journal article supplement (doi:10.3390/v13040616), 2021-04-03
Supplement: s1 [file s1]

**Table S1.** List of amino acids that are strictly conserved in the HCV-infected patients<sup>a</sup>.

| <b>Region</b> | <b>Number of conserved positions</b> | <b>Conserved positions<sup>b</sup></b>                                                                                                                                                |
|---------------|--------------------------------------|---------------------------------------------------------------------------------------------------------------------------------------------------------------------------------------|
| <b>NS3</b>    | 40                                   | 32, 41, 44, 45, 53, 57, 58, 59, 60, 70, 73, 75, 77, 82, 85, 90, 97, 100, 106, 111, 118, 126, 129, 131, 135, 137, 138, 140, 141, 142, 145, 148, 149, 152, 157, 160, 161, 162, 164, 173 |
| <b>NS5A</b>   | 24                                   | 29, 32, 33, 42, 45, 47, 51, 57, 65, 70, 76, 80, 82, 86, 89, 96, 106, 109, 118, 128, 131, 141, 142, 152                                                                                |

<sup>a</sup> The clinical history of the 220 patients cohort under study was described in Chen et al., *Antiviral Research* 174: 104694, 2020.

<sup>b</sup> The HCV genome residue numbering corresponds to the H77 genome (accession number #AF009606).
